# Supplementary material for: “Stealthy” chitosan/mesoporous silica nanoparticle based complex system for tumor-triggered intracellular drug release
Source: Royal Society of Chemistry journal article supplement (doi:10.1039/c5tb02548f), 2016-01-01
Supplement: c5tb02548f1.pdf [file c5tb02548f1.pdf]

Electronic supplementary information (ESI)

**“Stealthy”chitosan/mesoporous silica nanoparticle based complex  
system for tumor-triggered intracellular drug release**

*Min Zhang, Jia Liu, Ying Kuang, Qilin Li, Hongyu Chen, Haifeng Ye, Li Guo, Yanglin*

*Xu, Xueqin Chen, Cao Li\*, Bingbing Jiang\**

**Synthesis of DOX loaded mPEG succinimidyl carboxymethyl ester shielded MSN-SS-CHI (DOX@MSN-SS-CHI-PEG\*)**

mPEG succinimidyl carboxymethyl ester (mPEG-SC,  $M_w = 2000$ ) was purchased from Jenkem Technology Co., Ltd., Beijing, China.

100 mg of DOX@MSN-SS-CHI was suspended in 50 mL of anhydrous DMSO. 200 mg of mPEG-SC and 0.2 mL anhydrous triethylamine was then dissolved in the suspension. The reaction was taken at 40 °C for 72 h. After that, the product was centrifuged, washed with DI water, and lyophilized to give DOX loaded DOX@MSN-SS-CHI-PEG\*.

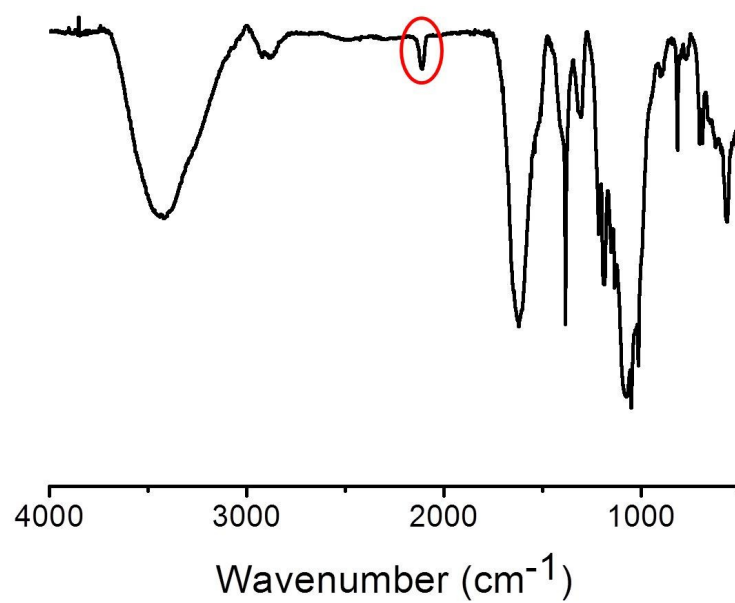

**Fig. S1** FT-IR spectrum of CHI-N<sub>3</sub>.

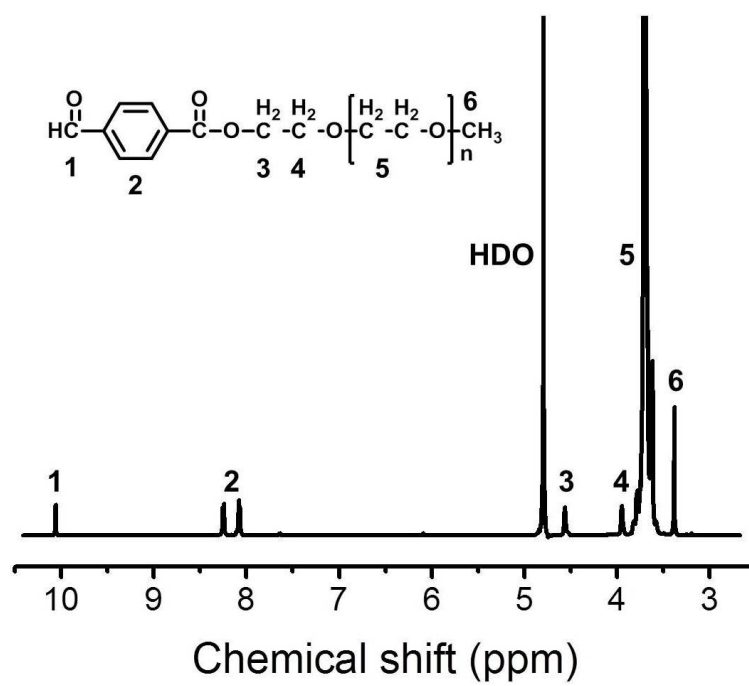

**Fig. S2**  $^1\text{H}$  NMR spectrum of mPEG-CHO.

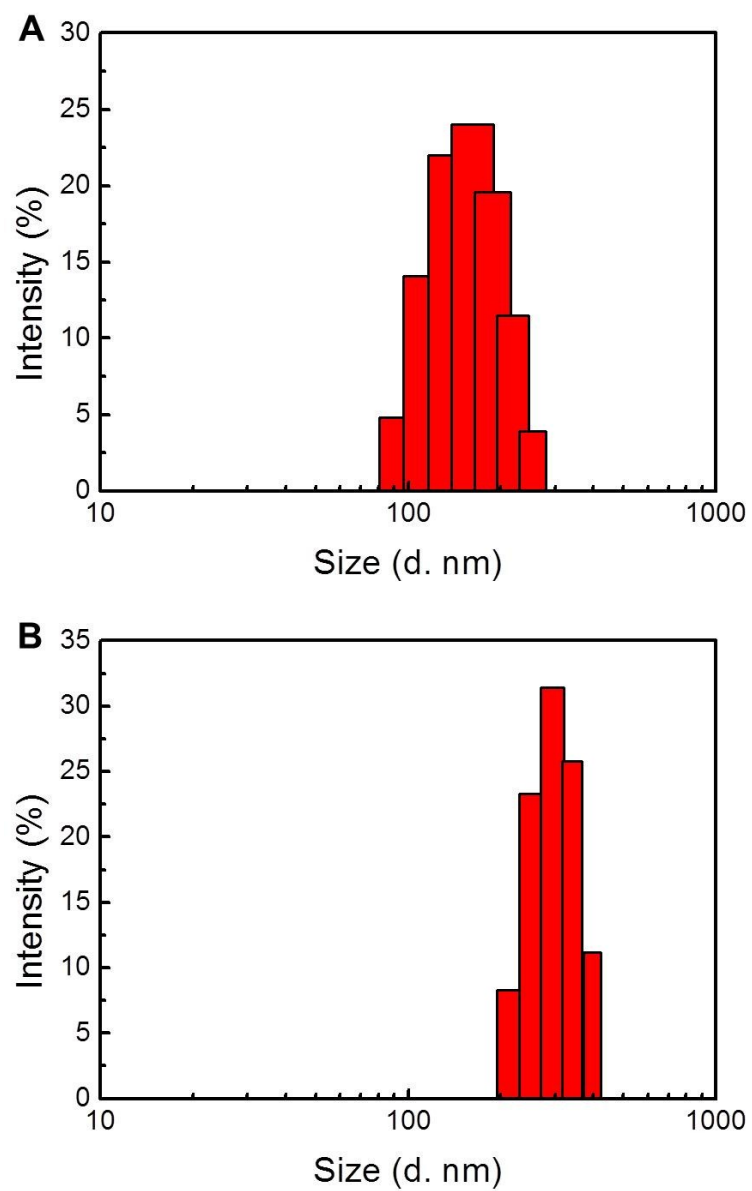

**Fig. S3** Size distributions of MSN-SH (A) and DOX@MSN-SS-CHI-PEG (B).

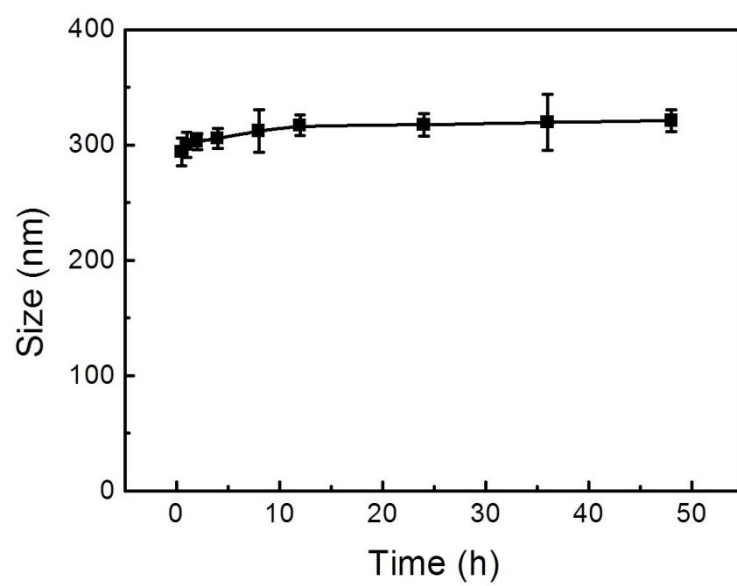

**Fig. S4** Sizes of DOX@MSN-SS-CHI-PEG being dipped and shaken in pH 7.4 PBS  
at 37 °C.

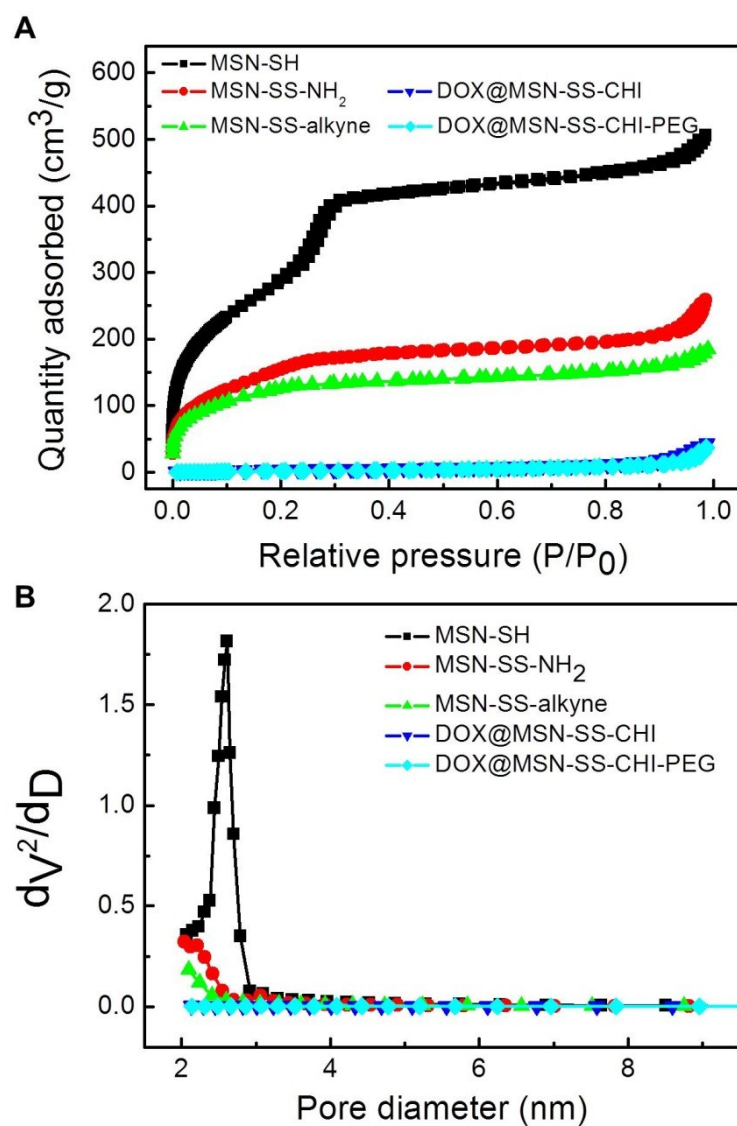

**Fig. S5** Nitrogen adsorption-desorption isotherms (A) and BJH pore distributions (B)

of MSN-SH, MSN-SS- $\text{NH}_2$ , MSN-SS-alkyne, DOX@MSN-SS-CHI and

DOX@MSN-SS-CHI-PEG.

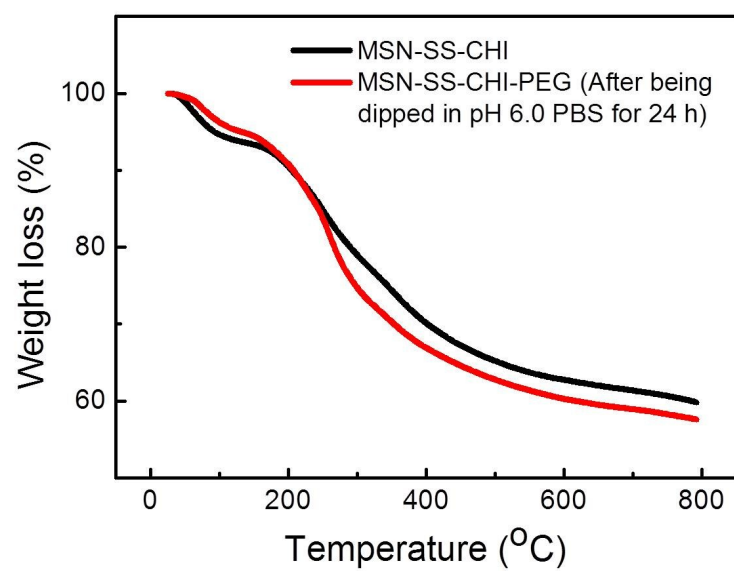

**Fig. S6** TGA curves of MSN-SS-CHI and MSN-SS-CHI-PEG after being dipped in pH 6.0 PBS for 24.
